# Supplementary material
Source: HighWire-hosted journal article supplement (https://bmjopen.bmj.com/content/9/5/e025869)
Supplement: inline-supplementary-material-1 [file inline-supplementary-material-1.docx]

**Online-only Supplementary**

Table S-1: Characteristics of participants by ethnic group

| **Socio-demographic factors** | | **Chinese** | | | | | | **Malay** | | | | | | | | **Indian** | | | | | | | |
| --- | --- | --- | --- | --- | --- | --- | --- | --- | --- | --- | --- | --- | --- | --- | --- | --- | --- | --- | --- | --- | --- | --- | --- |
| **Normotensive** | | | **Hypertensive** | | **p-value** | | **Normotensive** | | | **Hypertensive** | | **p-value** | | | **Normotensive** | | **Hypertensive** | | | **p-value** | | | |  |
|  |  |  | |  |  | |  |  |  | |  | |  | |  |  | |  |  | |  | |
| **Age (years), mean (SD)** | | 42.2 | (11.3) | 54.7 | | (11.4) | <0.001 | | 40.1 | (11.1) | 53.0 | | (10.9) | | <0.001 | | 41.2 | (11.2) | | 53.8 | (11.1) | | <0.001 | |
| **Gender, n (%)** | |  |  |  | |  | <0.001 | |  |  |  | |  | | 0.181 | |  |  | |  |  | | 0.004 | |
|  | Female | 1,921 | (72.4) | 734 | | (27.6) |  | | 1,031 | (65.9) | 533 | | (34.1) | |  | | 1,161 | (73.7) | | 415 | (26.3) | |  | |
|  | Male | 1,377 | (63.7) | 785 | | (36.3) |  | | 749 | (68.4) | 346 | | (31.6) | |  | | 797 | (68.6) | | 365 | (31.4) | |  | |
| **Blood pressure (mm Hg), mean (SD)** | |  |  |  | |  |  | |  |  |  | |  | |  | |  |  | |  |  | |  | |
|  | Systolic BP, mean (SD) | 116.74 | (11.97) | 149.09 | | (16.80) | <0.001 | | 118.03 | (12.02) | 150.04 | | (17.33) | | <0.001 | | 114.49 | (12.91) | | 147.24 | (18.70) | | <0.001 | |
|  | Diastolic BP, mean (SD) | 70.40 | (8.48) | 84.40 | | (10.57) | <0.001 | | 69.78 | (8.33) | 83.32 | | (11.07) | | <0.001 | | 69.14 | (8.64) | | 82.18 | (11.40) | | <0.001 | |
| **Highest education level, n (%)** | |  |  |  | |  | <0.001 | |  |  |  | |  | | <0.001 | |  |  | |  |  | | <0.001 | |
|  | Primary or lower | 499 | (46.5) | 573 | | (53.5) |  | | 419 | (51.2) | 400 | | (48.8) | |  | | 511 | (58.6) | | 361 | (41.4) | |  | |
|  | Secondary | 1,228 | (68.6) | 561 | | (31.4) |  | | 1,027 | (71.8) | 404 | | (28.2) | |  | | 820 | (72.8) | | 306 | (27.2) | |  | |
|  | Tertiary or higher | 1,569 | (80.3) | 385 | | (19.7) |  | | 332 | (81.6) | 75 | | (18.4) | |  | | 626 | (84.7) | | 113 | (15.3) | |  | |
| **Marital status, n (%)** | |  |  |  | |  | <0.001 | |  |  |  | |  | | 0.001 | |  |  | |  |  | | 0.832 | |
|  | Currently married | 2,366 | (65.6) | 1,242 | | (34.4) |  | | 1,359 | (65.3) | 721 | | (34.7) | |  | | 1,477 | (71.4) | | 592 | (28.6) | |  | |
|  | Not married/divorced/separated | 930 | (77.1) | 277 | | (22.9) |  | | 420 | (72.7) | 158 | | (27.3) | |  | | 479 | (71.8) | | 188 | (28.2) | |  | |
| **Work status, n (%)** | |  |  |  | |  | <0.001 | |  |  |  | |  | | <0.001 | |  |  | |  |  | | <0.001 | |
|  | Working/Studying full-time | 2,642 | (74.2) | 919 | | (25.8) |  | | 1,209 | (74.3) | 419 | | (25.7) | |  | | 1,355 | (76.0) | | 428 | (24.0) | |  | |
|  | Homemaker | 475 | (59.7) | 321 | | (40.3) |  | | 467 | (58.1) | 337 | | (41.9) | |  | | 436 | (65.7) | | 228 | (34.3) | |  | |
|  | Retired/Unemployed | 162 | (37.4) | 271 | | (62.6) |  | | 99 | (45.6) | 118 | | (54.4) | |  | | 158 | (56.4) | | 122 | (43.6) | |  | |
| **Monthly household income (SGD)^, n (%)** | |  |  |  | |  | <0.001 | |  |  |  | |  | | <0.001 | |  |  | |  |  | | <0.001 | |
|  | <2,000 | 379 | (57.7) | 278 | | (42.3) |  | | 543 | (67.8) | 258 | | (32.2) | |  | | 555 | (67.8) | | 264 | (32.2) | |  | |
|  | 2,000-3,999 | 713 | (73.3) | 260 | | (26.7) |  | | 563 | (70.9) | 231 | | (29.1) | |  | | 603 | (70.8) | | 249 | (29.2) | |  | |
|  | 4,000-5,999 | 554 | (75.2) | 183 | | (24.8) |  | | 317 | (70.8) | 131 | | (29.2) | |  | | 382 | (79.7) | | 97 | (20.3) | |  | |
|  | ≥6,000 | 707 | (75.2) | 233 | | (24.8) |  | | 162 | (78.6) | 44 | | (21.4) | |  | | 244 | (77.2) | | 72 | (22.8) | |  | |
| *n refers to number, SD refers to standard deviation ^Of all participants, 21.5% did not provide information on their averaged monthly household income. They have been categorized as ‘unknown income’ and included for analysis; For categorical variables, we reported the counts and percentages, and used the chi-square test to assess association between each categorical variable and hypertension status. For continuous variables, we reported the mean and standard deviation and used the 2-sample independent t-test to assess association between the continuous variable and hypertension status.* | | | | | | | | | | | | | | | | | | | | | | | |
